# Supplementary material for: Monkeypox Virus Infection in 18-Year-Old Woman after Sexual Intercourse, France, September 2022
Source: PubMed Central journal article supplement (PMC9796185; doi:10.3201/eid2901.221643), 2023-01
Supplement: 22-1643-Techapp-s1.pdf [file 22-1643-Techapp-s1.pdf]

# Monkeypox Virus Infection in 18-Year-Old Woman after Sexual Intercourse, France, September 2022

## Appendix

### Timeline of Monkeypox Virus Infection

August 25, 2022: Boyfriend develops fever and rashes.

August 26, 2022: Oral and vaginal intercourse between the woman and her boyfriend

September 1, 2022: Rashes disappear in boyfriend (no additional information available).

September 2, 2022: Feverish episode for the female

September 2, 2022: First eruptions on gluteal area for woman (photographed on September 7, 2022) (Appendix Figure 1)

September 3, 2022: First eruptions on genital area (photographed on September 7, 2022) (Appendix Figure 2)

September 7, 2022: Clinical visit at Foch Hospital, Suresnes, France. Rashes on hands and wrists of the woman have developed (photographed on September 7, 2022) (Appendix Figure 3)

September 7, 2022: Intravaginal lesions (photographed on September 7, 2022) (Appendix Figure 4)

September 8, 2022: Woman tests positive for monkeypox virus by reverse transcription PCR positive

October 12, 2022: Second visit at Foch Hospital. Beginning of disappearance of rashes for woman (photographed on October 12, 2022) (Appendix Figure 5)

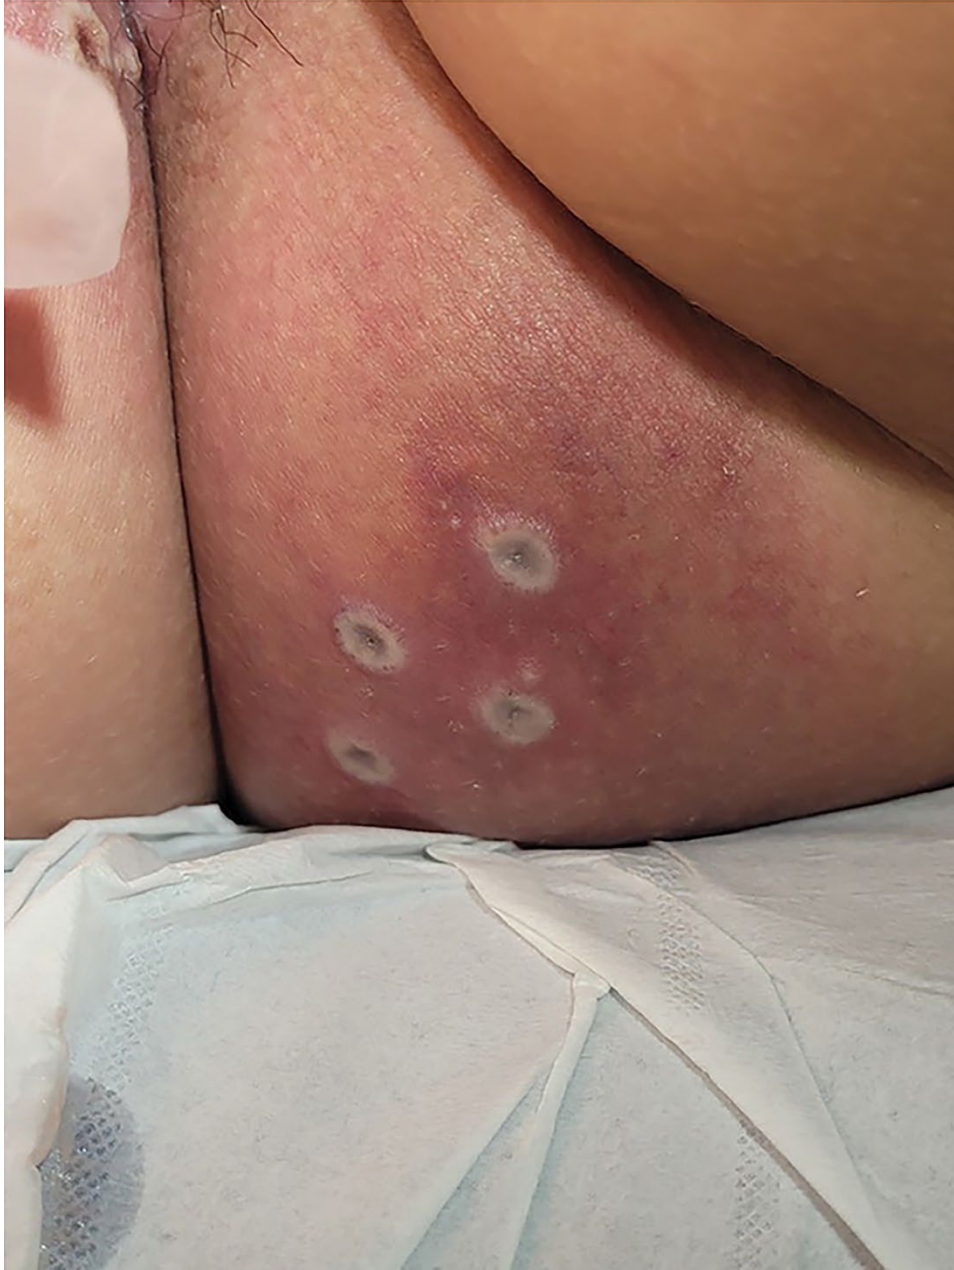

**Appendix Figure 1.** Pustules in gluteal area of young woman with monkeypox virus infection after sexual intercourse, France, September 2022

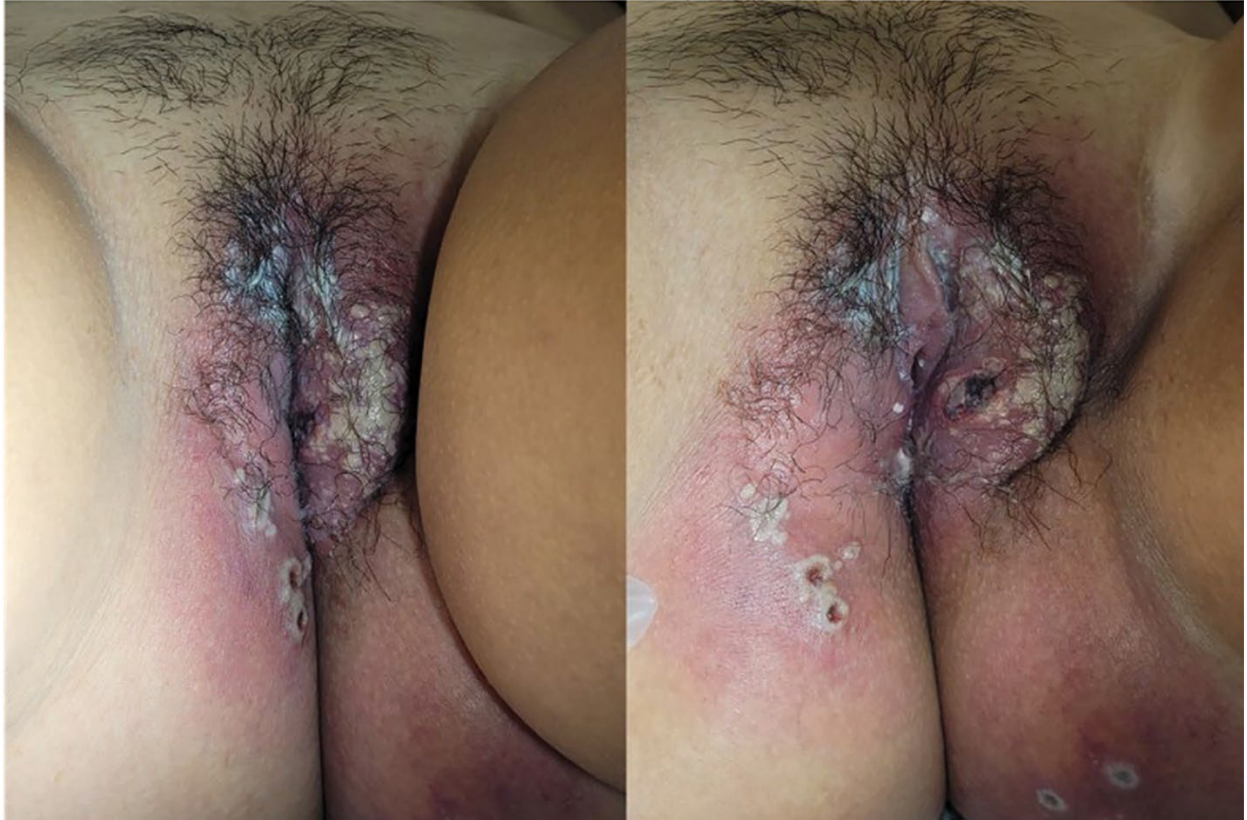

**Appendix Figure 2.** Pustules in genital area of young woman with monkeypox virus infection after sexual intercourse, France, September 2022

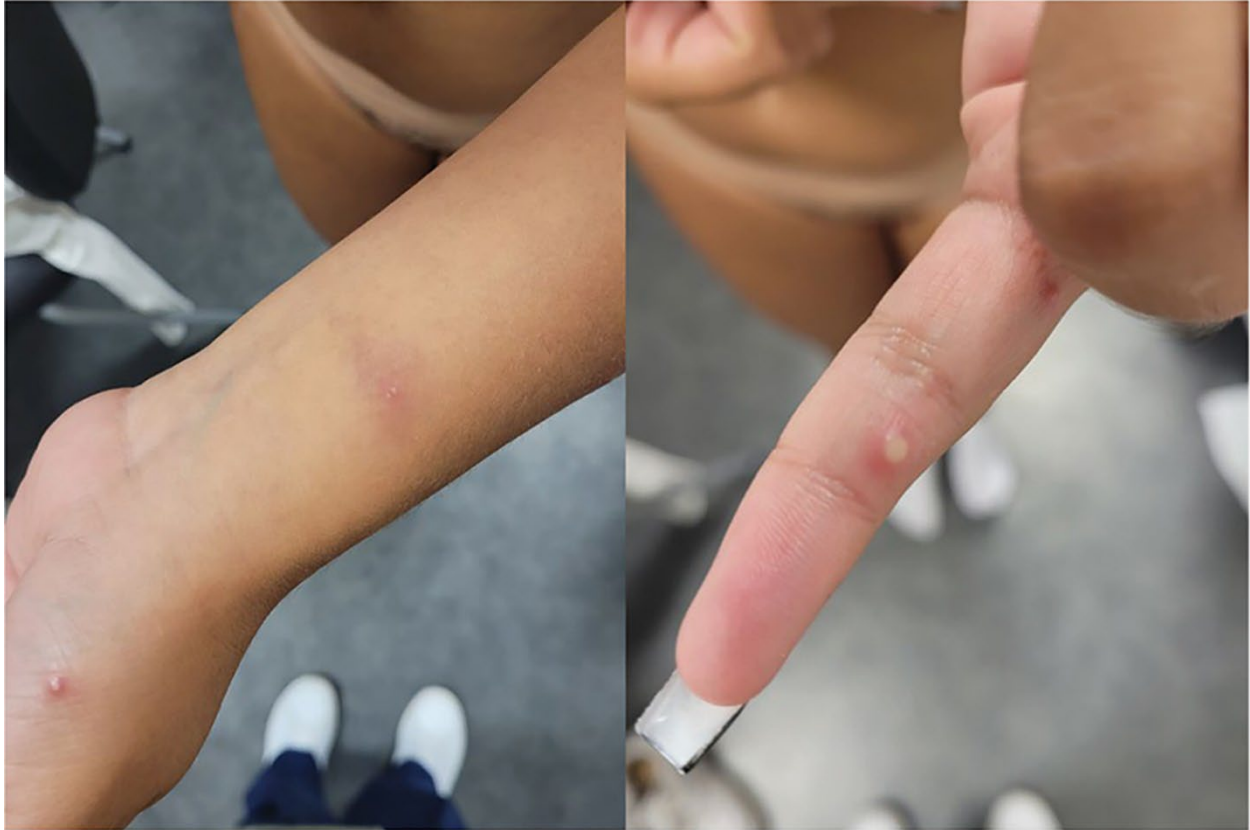

**Appendix Figure 3.** Pustules on arm, hand, and finger of young woman with monkeypox virus infection after sexual intercourse, France, September 2022

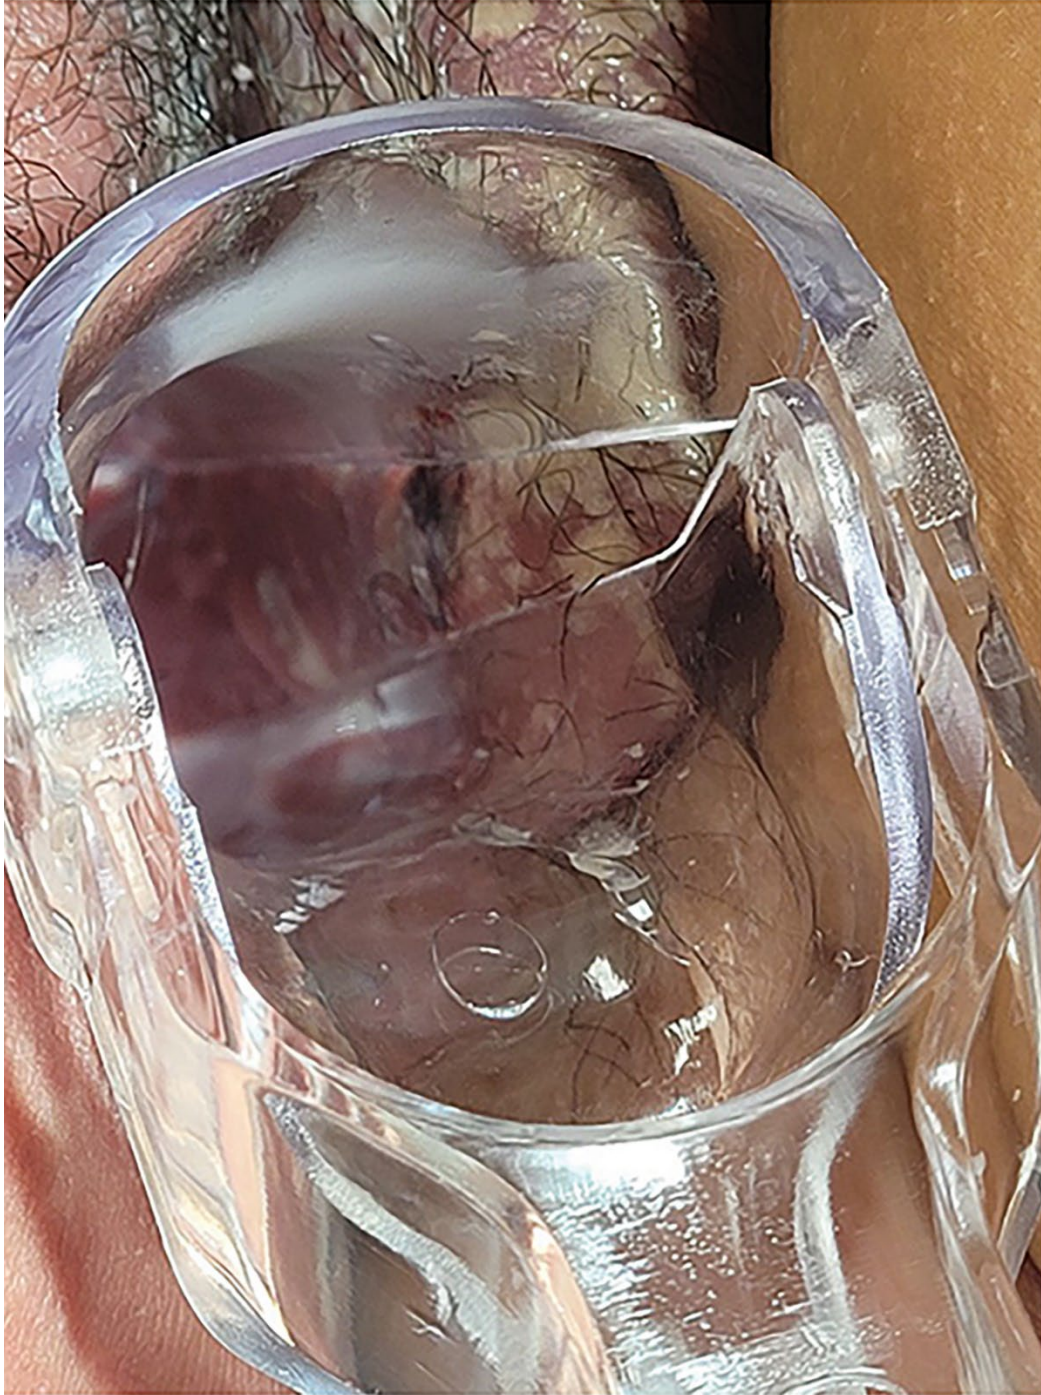

**Appendix Figure 4.** Pustules in intravaginal area of young woman with monkeypox virus infection after sexual intercourse, France, September 2022

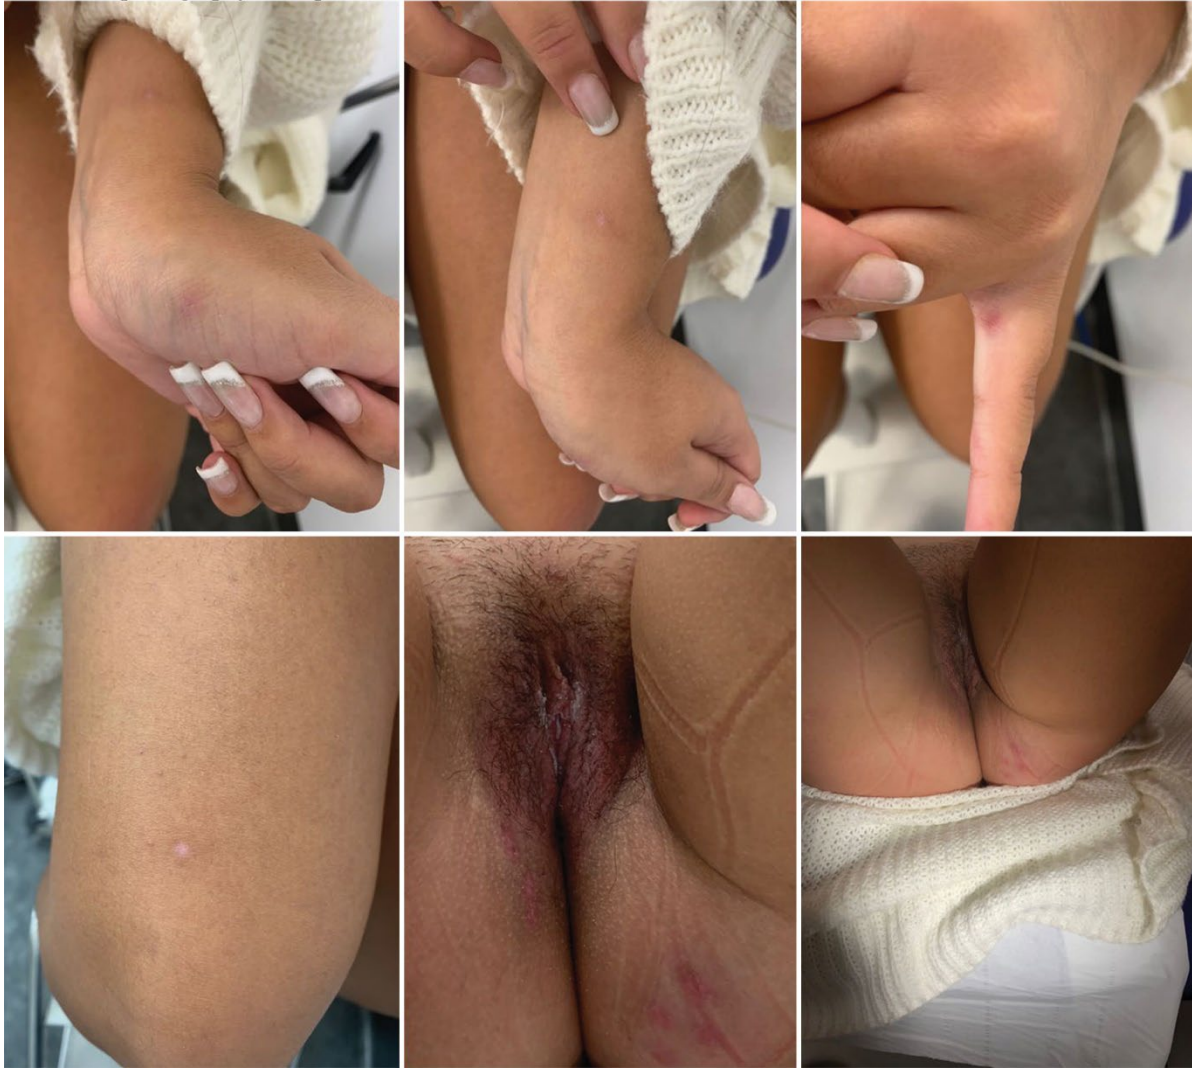

**Appendix Figure 5.** Healing pustules in young woman with monkeypox virus infection after sexual intercourse, France, September 2022
